# Supplementary figures and images for: Relative roles of local disturbance, current climate and paleoclimate in determining phylogenetic and functional diversity in Chinese forests
Source: Copernicus journal article supplement (doi:10.5194/bg-11-1361-2014), 2014-03-10

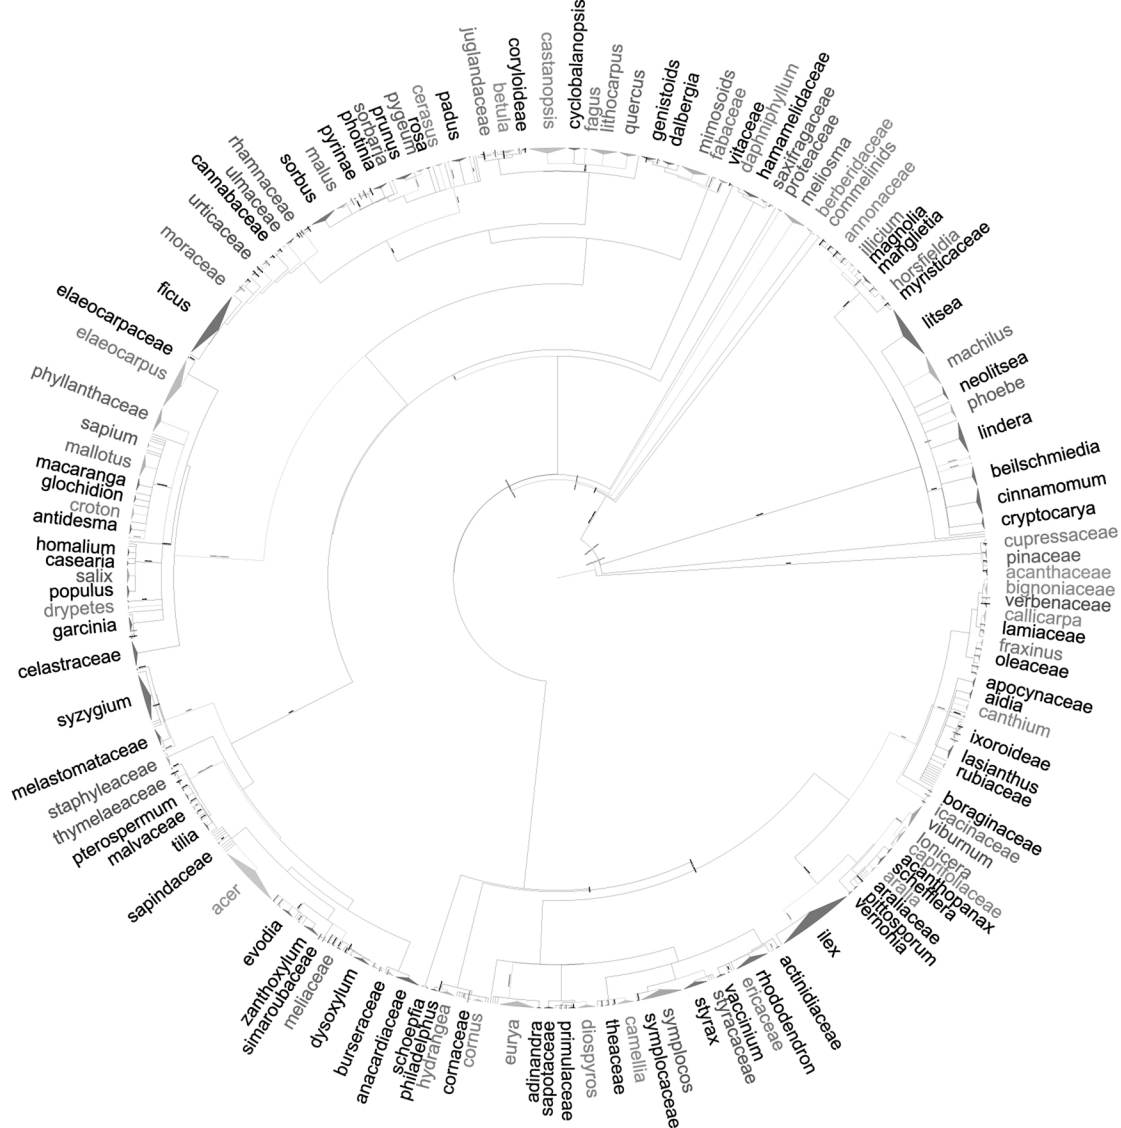

Supplement: Supplementary file 2 [file bg-11-1361-2014-supplement.zip]
